# Supplementary material
Source: PubMed Central journal article supplement (PMC2671223)
Supplement: NIHMS102456-supplement-Sup_Table_1.pdf [file NIHMS102456-supplement-Sup_Table_1.pdf]

**SUPPLEMENTAL TABLE S1**

| <b>GROUP</b>     | <b>HYDRATION</b> | <b>SURFACE PH</b> | <b>BASAL TEWL</b> |
|------------------|------------------|-------------------|-------------------|
| <b>Wild Type</b> | 56.75 $\pm$ 4.50 | 6.98 $\pm$ 0.26   | 14.75 $\pm$ 1.25  |
| <b>Knockout</b>  | 58.80 $\pm$ 1.36 | 6.70 $\pm$ 0.08   | 14.80 $\pm$ 1.85  |
| Significance     | NS               | NS                | NS                |
